# Supplementary material
Source: PubMed Central journal article supplement (PMC4032376)
Supplement: NIHMS552453-supplement-01.pdf [file NIHMS552453-supplement-01.pdf]

## Local Gyrfication Index in Probands with Psychotic Disorders and Their First-Degree Relatives

### *Supplemental Information*

**Table S1.** Handedness information of included participants

|                           | Controls |     |    | Psychotic Bipolar Disorder |     |    | Schizoaffective Disorder |     |    | Schizophrenia |     |    | Relatives |     |    |
|---------------------------|----------|-----|----|----------------------------|-----|----|--------------------------|-----|----|---------------|-----|----|-----------|-----|----|
|                           | L        | R   | A  | L                          | R   | A  | L                        | R   | A  | L             | R   | A  | L         | R   | A  |
| Handedness                | 30       | 207 | 2  | 18                         | 121 | 1  | 6                        | 80  | 4  | 18            | 134 | 3  | 19        | 277 | 3  |
| Distribution <sup>a</sup> | 13%      | 87% | 1% | 13%                        | 86% | 1% | 7%                       | 89% | 4% | 12%           | 86% | 2% | 6%        | 93% | 1% |

L, left-handed; R, right-handed; A, ambidextrous.

<sup>a</sup> 8 participants were unknown.

**Table S2.** Distribution of relatives by their own diagnosis and their related proband's diagnosis

|  | Proband Diagnosis          | Relative's Own Diagnosis |                      |                     |              | Total      |
|--|----------------------------|--------------------------|----------------------|---------------------|--------------|------------|
|  |                            | Axis II Cluster A        | Axis I Non-Psychotic | Axis II Cluster B/C | No Diagnosis |            |
|  | Schizophrenia              | 17                       | 53                   | 0                   | 44           | 114<br>38% |
|  | Schizoaffective Disorder   | 13                       | 38                   | 2                   | 32           | 85<br>28%  |
|  | Psychotic Bipolar Disorder | 5                        | 61                   | 2                   | 33           | 101<br>34% |
|  | Total                      | 35<br>12%                | 152<br>51%           | 4<br>1%             | 109<br>36%   | 300        |

**Table S3.** Sites of included participants

|                                                          | <b>Controls</b> | <b>Schizophrenia</b> | <b>Schizoaffective Disorder</b> | <b>Psychotic Bipolar Disorder</b> | <b>Relatives</b> | <b>Total</b> |
|----------------------------------------------------------|-----------------|----------------------|---------------------------------|-----------------------------------|------------------|--------------|
| Wayne State University                                   | 33              | 28                   | 3                               | 25                                | 40               | 129          |
| Harvard University                                       | 26              | 7                    | 1                               | 7                                 | 23               | 64           |
| Maryland Psychiatric Research Center                     | 44              | 52                   | 21                              | 23                                | 50               | 190          |
| University of Chicago, University of Illinois at Chicago | 57              | 30                   | 21                              | 48                                | 97               | 253          |
| University of Texas Southwestern                         | 49              | 14                   | 24                              | 23                                | 55               | 165          |
| Institute of Living, Yale University                     | 34              | 26                   | 20                              | 15                                | 35               | 130          |
